# Supplementary material for: Remote Tool-Based Adjudication for Grading Diabetic Retinopathy
Source: PubMed Central journal article supplement — Transl Vis Sci Technol. 2019 Dec 18;8(6):40. doi: 10.1167/tvst.8.6.40 (PMC6922270; doi:10.1167/tvst.8.6.40), 2019-12-18
Supplement: tvst-08-06-22_s01.pdf [file tvst-08-06-22_s01.pdf]

| Table S1. Rubric for DR severity assessment  |                                                                                                                                                                                                                                                                                                                                                                                                                                                                    |             |      |
|----------------------------------------------|--------------------------------------------------------------------------------------------------------------------------------------------------------------------------------------------------------------------------------------------------------------------------------------------------------------------------------------------------------------------------------------------------------------------------------------------------------------------|-------------|------|
| Question                                     | Possible answers                                                                                                                                                                                                                                                                                                                                                                                                                                                   | Included in |      |
|                                              |                                                                                                                                                                                                                                                                                                                                                                                                                                                                    | TA          | TA-F |
| <b>Gradability</b>                           |                                                                                                                                                                                                                                                                                                                                                                                                                                                                    |             |      |
| How gradable is this image for DR?           | <u>Gradable</u><br><u>Ungradable</u> : Images do not show key regions with good enough quality for a confident grading. Also the other visible areas do not show any obvious pathology.                                                                                                                                                                                                                                                                            | Yes         | Yes  |
| <b>Fundus Features</b>                       |                                                                                                                                                                                                                                                                                                                                                                                                                                                                    |             |      |
| Microaneurysms?                              | <u>No</u><br><u>Yes</u><br><u>Ungradable</u>                                                                                                                                                                                                                                                                                                                                                                                                                       | No          | Yes  |
| Cotton-wool spots?                           | <u>No</u><br><u>Yes</u><br><u>Ungradable</u>                                                                                                                                                                                                                                                                                                                                                                                                                       | No          | Yes  |
| Hard exudates?                               | <u>No</u><br><u>Yes</u><br><u>Ungradable</u>                                                                                                                                                                                                                                                                                                                                                                                                                       | No          | Yes  |
| Retinal hemorrhage?                          | <u>No</u><br><u>Yes, but not extensive in 4 quadrants</u><br><u>Extensive in 4 quadrants</u> : "Extensive" means that there are more than 20 retinal hemorrhages, or hemorrhages at least as severe as in ETDRS standard photo 2A.<br><u>Ungradable</u>                                                                                                                                                                                                            | No          | Yes  |
| Definite venous beading?                     | <u>No</u><br><u>In 1 quadrant only</u><br><u>In 2+ quadrants</u><br><u>Ungradable</u>                                                                                                                                                                                                                                                                                                                                                                              | No          | Yes  |
| IRMA?                                        | <u>No</u><br><u>Yes, but not prominent</u><br><u>Prominent</u> : "Prominent" means there is any IRMA at least as severe as in ETDRS standard photo 8A.<br><u>Ungradable</u>                                                                                                                                                                                                                                                                                        | No          | Yes  |
| Neovascularization or fibrous proliferation? | <u>No</u><br><u>Yes</u><br><u>Ungradable</u>                                                                                                                                                                                                                                                                                                                                                                                                                       | No          | Yes  |
| Vitreous or preretinal hemorrhage?           | <u>No</u><br><u>Yes</u><br><u>Ungradable</u>                                                                                                                                                                                                                                                                                                                                                                                                                       | No          | Yes  |
| PRP laser scars?                             | <u>No</u><br><u>Yes</u><br><u>Ungradable</u>                                                                                                                                                                                                                                                                                                                                                                                                                       | No          | Yes  |
| Focal laser scars?                           | <u>No</u><br><u>Yes</u><br><u>Ungradable</u>                                                                                                                                                                                                                                                                                                                                                                                                                       | No          | Yes  |
| <b>Diagnosis</b>                             |                                                                                                                                                                                                                                                                                                                                                                                                                                                                    |             |      |
| DR Grade                                     | <u>No diabetic retinopathy</u> : No abnormalities<br><u>Mild NPDR</u> : Microaneurysms only<br><u>Moderate NPDR</u> : More than just microaneurysms but less than Severe NPDR<br><u>Severe NPDR</u> : No signs of proliferative disease and one of: extensive (>20) intraretinal hemorrhages in each of 4 quadrants or definite venous beading in 2+ quadrants or prominent IRMA<br><u>Proliferative DR</u> : Neovascularization or vitreous/preretinal hemorrhage | Yes         | Yes  |
| Hypertensive retinopathy                     | <u>No</u><br><u>Yes</u>                                                                                                                                                                                                                                                                                                                                                                                                                                            | No          | Yes  |
| Retinal vein occlusion (CRVO, BRVO, HRVO)    | <u>No</u><br><u>Yes</u>                                                                                                                                                                                                                                                                                                                                                                                                                                            | No          | Yes  |
| Retinal artery occlusion (CRAO, BRAO)        | <u>No</u><br><u>Yes</u>                                                                                                                                                                                                                                                                                                                                                                                                                                            | No          | Yes  |

Abbreviations: TA, Tool-based Adjudication; TA-F, Tool-based Adjudication with Feature Rubric; DR, Diabetic Retinopathy; ETDRS, Early Treatment Diabetic Retinopathy Study; IRMA, Intraretinal Microvascular Abnormalities; PRP, Panretinal Photocoagulation; NPDR, Non-Proliferative Diabetic Retinopathy; PDR, Proliferative Diabetic Retinopathy; RVO, Retinal Vein Occlusion; CRVO, Central Retinal Vein Occlusion; BRVO, Branch Retinal Vein Occlusion; HRVO, Hemi-central Retinal Vein Occlusion; RAO, Retinal Artery Occlusion; CRAO, Central Retinal Artery Occlusion; BRAO, Branch Retinal Artery Occlusion;

| <b>Table S2. Confusion matrix for comparing the gradings between Tool-based Adjudication (TA) Panel A and Baseline Adjudication</b> |                       |                  |                      |                    |            |                     |              |
|-------------------------------------------------------------------------------------------------------------------------------------|-----------------------|------------------|----------------------|--------------------|------------|---------------------|--------------|
| <b>Baseline</b>                                                                                                                     | <b>TA: Panel A</b>    |                  |                      |                    |            |                     |              |
|                                                                                                                                     | <b>No Apparent DR</b> | <b>Mild NPDR</b> | <b>Moderate NPDR</b> | <b>Severe NPDR</b> | <b>PDR</b> | <b>Not Gradable</b> | <b>Total</b> |
| <b>No Apparent DR</b>                                                                                                               | 206                   | 8                | 2                    | 0                  | 0          | 0                   | 216          |
| <b>Mild NPDR</b>                                                                                                                    | 5                     | 7                | 2                    | 0                  | 0          | 1                   | 15           |
| <b>Moderate NPDR</b>                                                                                                                | 4                     | 5                | 89                   | 6                  | 2          | 0                   | 106          |
| <b>Severe NPDR</b>                                                                                                                  | 1                     | 0                | 15                   | 46                 | 7          | 1                   | 70           |
| <b>PDR</b>                                                                                                                          | 0                     | 0                | 3                    | 3                  | 49         | 0                   | 55           |
| <b>Not Gradable</b>                                                                                                                 | 18                    | 0                | 3                    | 2                  | 0          | 3                   | 26           |
| <b>Total</b>                                                                                                                        | 234                   | 20               | 114                  | 57                 | 58         | 5                   | 488          |

The columns represent the grades from Tool-based Adjudication (TA) Panel A. The rows represent the grades from Baseline Adjudication. DR = Diabetic Retinopathy; NPDR = Non-Proliferative Diabetic Retinopathy; PDR = Proliferative Diabetic Retinopathy. The two cases with persistent disagreement from TA Panel A were grouped with ungradable images in this table.

| <b>Table S3. Confusion matrix for comparing the gradings between Tool-based Adjudication (TA) Panel B and Baseline Adjudication</b> |                       |                  |                      |                    |            |                     |              |
|-------------------------------------------------------------------------------------------------------------------------------------|-----------------------|------------------|----------------------|--------------------|------------|---------------------|--------------|
| <b>Baseline</b>                                                                                                                     | <b>TA: Panel B</b>    |                  |                      |                    |            |                     |              |
|                                                                                                                                     | <b>No Apparent DR</b> | <b>Mild NPDR</b> | <b>Moderate NPDR</b> | <b>Severe NPDR</b> | <b>PDR</b> | <b>Not Gradable</b> | <b>Total</b> |
| <b>No Apparent DR</b>                                                                                                               | 199                   | 4                | 5                    | 0                  | 1          | 7                   | 216          |
| <b>Mild NPDR</b>                                                                                                                    | 5                     | 5                | 5                    | 0                  | 0          | 0                   | 15           |
| <b>Moderate NPDR</b>                                                                                                                | 0                     | 3                | 100                  | 2                  | 0          | 1                   | 106          |
| <b>Severe NPDR</b>                                                                                                                  | 0                     | 0                | 23                   | 44                 | 2          | 1                   | 70           |
| <b>PDR</b>                                                                                                                          | 0                     | 0                | 6                    | 4                  | 45         | 0                   | 55           |
| <b>Not Gradable</b>                                                                                                                 | 12                    | 1                | 0                    | 2                  | 0          | 11                  | 26           |
| <b>Total</b>                                                                                                                        | 216                   | 13               | 139                  | 52                 | 48         | 20                  | 488          |

The columns represent the grades from Tool-based Adjudication (TA) Panel B. The rows represent the grades from Baseline Adjudication. DR = Diabetic Retinopathy; NPDR = Non-Proliferative Diabetic Retinopathy; PDR = Proliferative Diabetic Retinopathy.

**Table S4. Confusion matrix for comparing the gradings between Tool-based Adjudication with Feature Rubric (TA-F) Panel C and Baseline Adjudication**

| Baseline       | TA-F: Panel C  |           |               |             |     |              |       |
|----------------|----------------|-----------|---------------|-------------|-----|--------------|-------|
|                | No Apparent DR | Mild NPDR | Moderate NPDR | Severe NPDR | PDR | Not Gradable | Total |
| No Apparent DR | 208            | 3         | 0             | 0           | 0   | 5            | 216   |
| Mild NPDR      | 9              | 3         | 3             | 0           | 0   | 0            | 15    |
| Moderate NPDR  | 4              | 3         | 95            | 1           | 0   | 3            | 106   |
| Severe NPDR    | 3              | 0         | 37            | 23          | 5   | 2            | 70    |
| PDR            | 2              | 0         | 3             | 2           | 46  | 2            | 55    |
| Not Gradable   | 14             | 0         | 1             | 0           | 1   | 10           | 26    |
| <b>Total</b>   | 240            | 9         | 139           | 26          | 52  | 22           | 488   |

The columns represent the grades from Tool-based Adjudication with Feature Rubric (TA-F) Panel C. The rows represent the grades from Baseline Adjudication. DR = Diabetic Retinopathy; NPDR = Non-Proliferative Diabetic Retinopathy; PDR = Proliferative Diabetic Retinopathy.

| <b>Table S5. Confusion matrix for comparing the gradings between Tool-based Adjudication with Feature Rubric (TA-F) Panel D and Baseline Adjudication</b> |                       |                  |                      |                    |            |                     |              |
|-----------------------------------------------------------------------------------------------------------------------------------------------------------|-----------------------|------------------|----------------------|--------------------|------------|---------------------|--------------|
| <b>Baseline</b>                                                                                                                                           | <b>TA-F: Panel D</b>  |                  |                      |                    |            |                     |              |
|                                                                                                                                                           | <b>No Apparent DR</b> | <b>Mild NPDR</b> | <b>Moderate NPDR</b> | <b>Severe NPDR</b> | <b>PDR</b> | <b>Not Gradable</b> | <b>Total</b> |
| <b>No Apparent DR</b>                                                                                                                                     | 212                   | 2                | 1                    | 0                  | 0          | 1                   | 216          |
| <b>Mild NPDR</b>                                                                                                                                          | 4                     | 10               | 1                    | 0                  | 0          | 0                   | 15           |
| <b>Moderate NPDR</b>                                                                                                                                      | 3                     | 5                | 88                   | 7                  | 3          | 0                   | 106          |
| <b>Severe NPDR</b>                                                                                                                                        | 0                     | 0                | 13                   | 49                 | 7          | 1                   | 70           |
| <b>PDR</b>                                                                                                                                                | 0                     | 0                | 1                    | 4                  | 50         | 0                   | 55           |
| <b>Not Gradable</b>                                                                                                                                       | 14                    | 1                | 0                    | 2                  | 0          | 9                   | 26           |
| <b>Total</b>                                                                                                                                              | 233                   | 18               | 104                  | 62                 | 60         | 11                  | 488          |

The columns represent the grades from Tool-based Adjudication with Feature Rubric (TA-F) Panel D. The rows represent the grades from Baseline Adjudication. DR = Diabetic Retinopathy; NPDR = Non-Proliferative Diabetic Retinopathy; PDR = Proliferative Diabetic Retinopathy.

**Table S6. Confusion matrix for comparing the gradings between Tool-based Adjudication (TA) Panels B and A**

| TA: Panel A    | TA: Panel B    |           |               |             |     |              |       |
|----------------|----------------|-----------|---------------|-------------|-----|--------------|-------|
|                | No Apparent DR | Mild NPDR | Moderate NPDR | Severe NPDR | PDR | Not Gradable | Total |
| No Apparent DR | 207            | 5         | 7             | 0           | 0   | 15           | 234   |
| Mild NPDR      | 8              | 5         | 6             | 0           | 1   | 0            | 20    |
| Moderate NPDR  | 1              | 3         | 99            | 7           | 2   | 2            | 114   |
| Severe NPDR    | 0              | 0         | 18            | 38          | 1   | 0            | 57    |
| PDR            | 0              | 0         | 7             | 7           | 44  | 0            | 58    |
| Not Gradable   | 0              | 0         | 2             | 0           | 0   | 3            | 5     |
| <b>Total</b>   | 216            | 13        | 139           | 52          | 48  | 20           | 488   |

The columns represent the grades from Tool-based Adjudication (TA) Panel B. The rows represent the grades from Tool-based Adjudication (TA) Panel A. DR = Diabetic Retinopathy; NPDR = Non-Proliferative Diabetic Retinopathy; PDR = Proliferative Diabetic Retinopathy. The two cases with persistent disagreement from TA Panel A were grouped with ungradable images in this table.

| <b>Table S7. Confusion matrix for comparing the gradings between Tool-based Adjudication with Feature Rubric (TA-F) Panels D and C</b> |                       |                  |                      |                    |            |                     |              |
|----------------------------------------------------------------------------------------------------------------------------------------|-----------------------|------------------|----------------------|--------------------|------------|---------------------|--------------|
|                                                                                                                                        | <b>TA-F: Panel D</b>  |                  |                      |                    |            |                     |              |
| <b>TA-F: Panel C</b>                                                                                                                   | <b>No Apparent DR</b> | <b>Mild NPDR</b> | <b>Moderate NPDR</b> | <b>Severe NPDR</b> | <b>PDR</b> | <b>Not Gradable</b> | <b>Total</b> |
| <b>No Apparent DR</b>                                                                                                                  | 223                   | 6                | 3                    | 2                  | 3          | 3                   | 240          |
| <b>Mild NPDR</b>                                                                                                                       | 2                     | 6                | 1                    | 0                  | 0          | 0                   | 9            |
| <b>Moderate NPDR</b>                                                                                                                   | 1                     | 4                | 95                   | 33                 | 5          | 1                   | 139          |
| <b>Severe NPDR</b>                                                                                                                     | 0                     | 0                | 2                    | 22                 | 2          | 0                   | 26           |
| <b>PDR</b>                                                                                                                             | 0                     | 0                | 1                    | 2                  | 48         | 1                   | 52           |
| <b>Not Gradable</b>                                                                                                                    | 7                     | 2                | 2                    | 3                  | 2          | 6                   | 22           |
| <b>Total</b>                                                                                                                           | 233                   | 18               | 104                  | 62                 | 60         | 11                  | 488          |

The columns represent the grades from Tool-based Adjudication with Feature Rubric (TA-F) Panel D. The rows represent the grades from Tool-based Adjudication with Feature Rubric (TA-F) Panel C. DR = Diabetic Retinopathy; NPDR = Non-Proliferative Diabetic Retinopathy; PDR = Proliferative Diabetic Retinopathy.

| Table S8. Discussions from the two Cases with persistent disagreement in Panel A |                                                                                                                |                                                                                                                                |
|----------------------------------------------------------------------------------|----------------------------------------------------------------------------------------------------------------|--------------------------------------------------------------------------------------------------------------------------------|
| Round                                                                            | Case 1                                                                                                         | Case 2                                                                                                                         |
| 0                                                                                | G1: [Severe NPDR] <i>"IRMA temp"</i><br>G2: [Mild NPDR]<br>G3: [Mild NPDR] <i>"large ma's"</i>                 | G1: [PDR]<br>G2: [Moderate NPDR]<br>G3: [Moderate NPDR]                                                                        |
| 1                                                                                | G1: [Severe NPDR]                                                                                              | G2: [Severe NPDR]                                                                                                              |
| 2                                                                                | G2: [Mild NPDR]                                                                                                | G3: [Severe NPDR] <i>"looks like irma rather than full on nve, but hard to tell due to picture quality"</i>                    |
| 3                                                                                | G3: [Mild NPDR] <i>"not sure i see the irma. not apparent on red-free either"</i>                              | G1: [PDR] <i>"I think it is NV"</i>                                                                                            |
| 4                                                                                | G1: [Severe NPDR] <i>"so I use the zoom function and see abnormal flat vessels at 9 o clock temp to fovea"</i> | G2: [Severe NPDR]                                                                                                              |
| 5                                                                                | G2: [Mild NPDR]                                                                                                | G3: [Severe NPDR]                                                                                                              |
| 6                                                                                | G3: [Mild NPDR]                                                                                                | G1: [PDR]                                                                                                                      |
| 7                                                                                | G1: [Severe NPDR]                                                                                              | G2: [Severe NPDR] <i>"Think its IRMA"</i>                                                                                      |
| 8                                                                                | G2: [Mild NPDR]                                                                                                | G3: [Severe NPDR] <i>"i still think it's irma"</i>                                                                             |
| 9                                                                                | G3: [Mild NPDR] <i>"[G1] want to go with majority?"</i>                                                        | G1: [PDR]                                                                                                                      |
| 10                                                                               | G1: [Moderate NPDR]                                                                                            | G2: [Severe NPDR] <i>"Don't believe this is NV. I am going towards IRMA. Think majority should go here so we can move on."</i> |
| 11                                                                               | G2: [Mild NPDR]                                                                                                | G3: [Severe NPDR] <i>"agree"</i>                                                                                               |
| 12                                                                               | G3: [Mild NPDR]                                                                                                | G1: [PDR]                                                                                                                      |
| 13                                                                               | G1: [Severe NPDR]                                                                                              | G2: [Severe NPDR]                                                                                                              |
| 14                                                                               | G2: [Mild NPDR]                                                                                                | G3: [Severe NPDR]                                                                                                              |
| 15                                                                               | G3: [Mild NPDR]                                                                                                | G1: [PDR]                                                                                                                      |

Abbreviations: G1, Grader 1; G2, Grader 2; G3, Grader 3; IRMA, Intraretinal Microvascular Abnormalities; MA, Microaneurysm; NPDR, Non-Proliferative Diabetic Retinopathy; NV, Neovascularization; NVE, Neovascularization elsewhere; PDR, Proliferative Diabetic Retinopathy; Temp, Temporal.



| <b>Table S9. Discussions from two example cases resolved in round 3 in Panel A</b> |                                                                                                                                                             |                                                                |
|------------------------------------------------------------------------------------|-------------------------------------------------------------------------------------------------------------------------------------------------------------|----------------------------------------------------------------|
| <b>Round</b>                                                                       | <b>Case 1</b>                                                                                                                                               | <b>Case 2</b>                                                  |
| 0                                                                                  | G1: [PDR] <i>“disc hemorrhage and prh may be nvd”</i><br>G2: [Moderate NPDR] <i>“Could also be preretinal heme on disc from NVD”</i><br>G3: [Moderate NPDR] | G1: [Severe NPDR]<br>G2: [Severe NPDR]<br>G3: [Moderate NPDR]  |
| 1                                                                                  | G3: [PDR] <i>“agree with the preretinal heme likely from nvd”</i>                                                                                           | G3: [Moderate NPDR] <i>“not as much hemorrhage inferiorly”</i> |
| 2                                                                                  | G1: [PDR]                                                                                                                                                   | G1: [Moderate NPDR]                                            |
| 3                                                                                  | G2: [PDR]                                                                                                                                                   | G2: [Moderate NPDR]                                            |

Abbreviations: G1, Grader 1; G2, Grader 2; G3, Grader 3; NPDR, Non-Proliferative Diabetic Retinopathy; NVD, Neovascularization of the disc; PDR, Proliferative Diabetic Retinopathy; PRH, Pre-Retinal Hemorrhage.

| <b>Table S10. Counts and percentages of cases resolved in different phases of Tool-based Adjudication, split by DR severity according to Baseline Adjudication.</b> |                                                       |                  |                      |                    |                 |                     |                  |
|---------------------------------------------------------------------------------------------------------------------------------------------------------------------|-------------------------------------------------------|------------------|----------------------|--------------------|-----------------|---------------------|------------------|
| <b>When was an agreement reached?</b>                                                                                                                               | <b>DR severity according to Baseline adjudication</b> |                  |                      |                    |                 |                     | <b>Total</b>     |
|                                                                                                                                                                     | <b>No Apparent DR</b>                                 | <b>Mild NPDR</b> | <b>Moderate NPDR</b> | <b>Severe NPDR</b> | <b>PDR</b>      | <b>Not Gradable</b> |                  |
| <b>Independently , without adjudication</b>                                                                                                                         | 723<br>(83.7%)                                        | 19<br>(31.7%)    | 269<br>(63.4%)       | 125<br>(44.6%)     | 160<br>(72.7%)  | 55<br>(52.9%)       | 1351<br>(69.2%)  |
| <b>At most 1 round of review / grader</b>                                                                                                                           | 99<br>(11.5%)                                         | 31<br>(51.7%)    | 126<br>(29.7%)       | 139<br>(49.6%)     | 50<br>(22.7%)   | 40<br>(38.5%)       | 485<br>(24.8%)   |
| <b>At most 2 rounds of review / grader</b>                                                                                                                          | 31<br>(3.6%)                                          | 7<br>(11.7%)     | 24<br>(5.7%)         | 10<br>(3.6%)       | 9<br>(4.1%)     | 8<br>(7.7%)         | 89<br>(4.6%)     |
| <b>&gt; 2 rounds of review for at least one grader</b>                                                                                                              | 11<br>(1.3%)                                          | 2<br>(3.3%)      | 5<br>(1.2%)          | 5<br>(1.8%)        | 1<br>(0.5%)     | 1<br>(1.0%)         | 25<br>(1.3%)     |
| <b>Persistent disagreement after 5 rounds / grader</b>                                                                                                              | 0<br>(0.0%)                                           | 1<br>(1.7%)      | 0<br>(0.0%)          | 1<br>(0.4%)        | 0<br>(0.0%)     | 0<br>(0.0%)         | 2<br>(0.1%)      |
| <b>Total</b>                                                                                                                                                        | 864<br>(100.0%)                                       | 60<br>(100.0%)   | 424<br>(100.0%)      | 280<br>(100.0%)    | 220<br>(100.0%) | 104<br>(100.0%)     | 1952<br>(100.0%) |

The columns represent the grades from Baseline Adjudication. The rows represent different phases of tool-based adjudication. DR = Diabetic Retinopathy; NPDR = Non-Proliferative Diabetic Retinopathy; PDR = Proliferative Diabetic Retinopathy. This table includes 1952 cases in total, i.e., 488 cases adjudicated by four independent adjudication panels, two panels in TA and TA-F each.

**Table S11. Time needed by each of the four panels in tool-based adjudication to fully adjudicate 499 images.**

| <b>Adjudication Panel</b> | <b>Hours on Task Total</b><br>(sum for all graders) | <b>Days Total</b><br>(end to end) |
|---------------------------|-----------------------------------------------------|-----------------------------------|
| TA: Panel A               | 23                                                  | 43                                |
| TA: Panel B               | 39                                                  | 54                                |
| TA-F: Panel C             | 23                                                  | 58                                |
| TA-F: Panel D             | 33                                                  | 19                                |
